# Supplementary material for: Die öffentliche Aushandlung von Expertise: Wissenschaftsblogs als Ort eristischer Verständigung? Exploratorischer Einstieg in ein Forschungsprojekt
Source: publisher site journal article supplement (doi:10.1515/zgl-2024-2008), 2024-04-10
Supplement: Supplementary file 1 [file Supporting Information.docx]

**7 Anhang [elektronisch]**

**Trigramm-Listen**

**Kommentare des gesamten SciLogs-Korpus (215.549)**

| Rang | Trigramm | Frequenz |
| --- | --- | --- |
| 1 | in der Tat | 3982 |
| 2 | Vielen Dank für | 3190 |
| 3 | in der Lage | 2639 |
| 4 | auch in der | 2420 |
| 5 | Und das ist | 2412 |
| 6 | in den USA | 2361 |
| 7 | z. B. die | 2163 |
| 8 | wenn man die | 2123 |
| 9 | meiner Meinung nach | 2111 |
| 10 | in den letzten | 2087 |
| 11 | in der Regel | 2061 |
| 12 | in Bezug auf | 2060 |
| 13 | es in der | 2053 |
| 14 | auf der Erde | 2042 |
| 15 | wie z. B. | 2033 |
| 16 | Das ist ein | 2029 |
| 17 | mehr oder weniger | 1947 |
| 18 | an dieser Stelle | 1883 |
| 19 | nicht in der | 1877 |
| 20 | so etwas wie | 1866 |
| 21 | wenn man sich | 1836 |
| 22 | Aus meiner Sicht | 1824 |
| 23 | Danke für die | 1791 |
| 24 | auf jeden Fall | 1775 |
| 25 | Danke für den | 1755 |
| 26 | das ist eine | 1749 |
| 27 | in der Natur | 1720 |
| 28 | dass sich die | 1715 |
| 29 | dass es sich | 1672 |
| 30 | Aber das ist | 1649 |
| 31 | in der Physik | 1645 |
| 32 | Mit freundlichen Grüßen | 1644 |
| 33 | ist es nicht | 1630 |
| 34 | und in der | 1616 |
| 35 | Sehr geehrter Herr | 1613 |
| 36 | und vor allem | 1604 |
| 37 | gibt es auch | 1601 |
| 38 | ist in der | 1576 |
| 39 | in diesem Sinne | 1547 |
| 40 | in der Welt | 1544 |
| 41 | dass sie sich | 1519 |
| 42 | in diesem Fall | 1515 |
| 43 | es sich um | 1512 |
| 44 | Nach wie vor | 1494 |
| 45 | nichts zu tun | 1489 |
| 46 | im zusammenhang mit | 1480 |
| 47 | Nicht nur die | 1476 |
| 48 | in diesem Zusammenhang | 1463 |
| 49 | im Sinne von | 1443 |
| 50 | wenn sie sich | 1441 |
| 51 | sich in der | 1440 |
| 52 | Im Gegensatz zu | 1436 |
| 53 | zu tun hat | 1428 |
| 54 | zu tun haben | 1417 |
| 55 | Das ist ja | 1409 |
| 56 | die Frage nach | 1395 |
| 57 | in der Wissenschaft | 1393 |
| 58 | Das ist nicht | 1385 |
| 59 | die Frage ist | 1385 |
| 60 | es ist nicht | 1362 |
| 61 | z. B. in | 1343 |
| 62 | die in der | 1327 |
| 63 | A und B | 1312 |
| 64 | Das ist doch | 1298 |
| 65 | ich weiß nicht | 1293 |
| 66 | handelt es sich | 1290 |
| 67 | Es gibt keine | 1285 |
| 68 | dann ist das | 1283 |
| 69 | Und es ist | 1277 |
| 70 | gar nicht so | 1271 |
| 71 | Ich finde es | 1261 |
| 72 | auch für die | 1254 |
| 73 | kann man sich | 1253 |
| 74 | halte ich für | 1251 |
| 75 | Das ist die | 1249 |
| 76 | Da gibt es | 1245 |
| 77 | wenn es um | 1228 |
| 78 | im Rahmen der | 1212 |
| 79 | das ist der | 1168 |
| 80 | Aber es ist | 1163 |
| 81 | Es handelt sich | 1159 |
| 82 | und es gibt | 1133 |
| 83 | man in der | 1130 |
| 84 | so gut wie | 1128 |
| 85 | im Sinne der | 1126 |
| 86 | geht es um | 1125 |
| 87 | Das kann man | 1122 |
| 88 | Das ist aber | 1114 |
| 89 | ist für mich | 1114 |
| 90 | Wenn man das | 1107 |
| 91 | das mit dem | 1101 |
| 92 | Dank für die | 1095 |
| 93 | dass man sich | 1086 |
| 94 | aber auch nicht | 1076 |
| 95 | auch wenn es | 1070 |
| 96 | Dass es in | 1061 |
| 97 | und nicht nur | 1059 |
| 98 | Ist das nicht | 1051 |
| 99 | Es geht um | 1043 |
| 100 | so ist es | 1029 |

**Kommentare des gesamten SciLogs-Korpus, die nicht vom jeweiligen Post-Autor stammen (178.116)**

| Rang | Trigramm | Frequenz |
| --- | --- | --- |
| 1 | in der Tat | 2685 |
| 2 | in der Lage | 2357 |
| 3 | Und das ist | 2002 |
| 4 | auch in der | 1974 |
| 5 | in den USA | 1933 |
| 6 | vielen Dank für | 1922 |
| 7 | auf der Erde | 1861 |
| 8 | wenn man die | 1840 |
| 9 | in Bezug auf | 1819 |
| 10 | meiner Meinung nach | 1800 |
| 11 | in der Regel | 1788 |
| 12 | in den letzten | 1774 |
| 13 | wie z. B. | 1699 |
| 14 | es in der | 1690 |
| 15 | mehr oder weniger | 1652 |
| 16 | z. B. die | 1647 |
| 17 | nicht in der | 1610 |
| 18 | so etwas wie | 1600 |
| 19 | Das ist ein | 1587 |
| 20 | an dieser Stelle | 1575 |
| 21 | wenn man sich | 1569 |
| 22 | Mit freundlichen Grüßen | 1558 |
| 23 | in der Natur | 1505 |
| 24 | Sehr geehrter Herr | 1499 |
| 25 | in der Physik | 1481 |
| 26 | dass sich die | 1460 |
| 27 | Aus meiner Sicht | 1449 |
| 28 | das ist eine | 1418 |
| 29 | ist es nicht | 1396 |
| 30 | auf jeden Fall | 1382 |
| 31 | dass es sich | 1371 |
| 32 | und in der | 1366 |
| 33 | gibt es auch | 1351 |
| 34 | und vor allem | 1336 |
| 35 | im zusammenhang mit | 1324 |
| 36 | in diesem Fall | 1294 |
| 37 | Aber das ist | 1293 |
| 38 | in der Welt | 1274 |
| 39 | in diesem Zusammenhang | 1267 |
| 40 | A und B | 1264 |
| 41 | Danke für die | 1264 |
| 42 | ist in der | 1262 |
| 43 | Nicht nur die | 1249 |
| 44 | in diesem Sinne | 1240 |
| 45 | es sich um | 1232 |
| 46 | im Sinne von | 1231 |
| 47 | nichts zu tun | 1228 |
| 48 | sich in der | 1216 |
| 49 | Im Gegensatz zu | 1204 |
| 50 | dass sie sich | 1179 |
| 51 | zu tun hat | 1172 |
| 52 | die Frage nach | 1170 |
| 53 | es ist nicht | 1161 |
| 54 | Nach wie vor | 1155 |
| 55 | zu tun haben | 1141 |
| 56 | Danke für den | 1138 |
| 57 | die in der | 1135 |
| 58 | Es gibt keine | 1133 |
| 59 | die Frage ist | 1126 |
| 60 | wenn sie sich | 1117 |
| 61 | in der Wissenschaft | 1115 |
| 62 | Das ist nicht | 1106 |
| 63 | Das ist doch | 1081 |
| 64 | handelt es sich | 1075 |
| 65 | Und es ist | 1071 |
| 66 | kann man sich | 1069 |
| 67 | dann ist das | 1062 |
| 68 | Das ist ja | 1056 |
| 69 | im Rahmen der | 1053 |
| 70 | Das ist die | 1051 |
| 71 | Da gibt es | 1047 |
| 72 | wenn es um | 1044 |
| 73 | auch für die | 1038 |
| 74 | Ich finde es | 1036 |
| 75 | ich weiß nicht | 1028 |
| 76 | gar nicht so | 1019 |
| 77 | im Sinne der | 1006 |
| 78 | das ist der | 979 |
| 79 | z. B. in | 976 |
| 80 | ist für mich | 974 |
| 81 | Es handelt sich | 965 |
| 82 | und es gibt | 958 |
| 83 | ∘ ∘ ∘ | 947 |
| 84 | Aber es ist | 921 |
| 85 | Halte ich für | 912 |
| 86 | Wenn man das | 908 |
| 87 | man in der | 906 |
| 88 | Das kann man | 903 |
| 89 | das mit dem | 896 |
| 90 | geht es um | 896 |
| 91 | auch wenn es | 894 |
| 92 | In meinen Augen | 894 |
| 93 | Es geht um | 889 |
| 94 | gibt es keine | 886 |
| 95 | dass man sich | 885 |
| 96 | gibt es nicht | 879 |
| 97 | Ist das nicht | 868 |
| 98 | Es gibt auch | 853 |
| 99 | kann man nicht | 852 |
| 100 | und nicht nur | 852 |

**Kommentaren des gesamten SciLogs-Korpus, die vom jeweiligen Post-Autor stammen (37.433)**

| Rang | Trigramm | Frequenz |
| --- | --- | --- |
| 1 | in der Tat | 1297 |
| 2 | Vielen Dank für | 1268 |
| 3 | Danke für den | 617 |
| 4 | Danke für die | 527 |
| 5 | z. B. die | 516 |
| 6 | für den Hinweis | 459 |
| 7 | Dank für die | 456 |
| 8 | auch in der | 446 |
| 9 | Das ist ein | 442 |
| 10 | in den USA | 428 |
| 11 | im Hinblick auf | 413 |
| 12 | Und das ist | 410 |
| 13 | auf jeden Fall | 393 |
| 14 | aus meiner Sicht | 375 |
| 15 | z. B. in | 367 |
| 16 | es in der | 363 |
| 17 | Aber das ist | 356 |
| 18 | Das ist ja | 353 |
| 19 | halte ich für | 339 |
| 20 | nach wie vor | 339 |
| 21 | wie z. B. | 334 |
| 22 | Das ist eine | 332 |
| 23 | Dank für den | 324 |
| 24 | wenn Sie sich | 324 |
| 25 | z. B. auch | 323 |
| 26 | Ist in der | 314 |
| 27 | in den letzten | 313 |
| 28 | Meiner Meinung nach | 311 |
| 29 | an dieser Stelle | 308 |
| 30 | In diesem Sinne | 307 |
| 31 | dass Sie sich | 301 |
| 32 | mehr oder weniger | 295 |
| 33 | so gut wie | 285 |
| 34 | wenn man die | 283 |
| 35 | in der Lage | 282 |
| 36 | es sich um | 280 |
| 37 | Das ist nicht | 279 |
| 38 | in der Wissenschaft | 278 |
| 39 | zu tun haben | 276 |
| 40 | das ist aber | 274 |
| 41 | in der Regel | 273 |
| 42 | Das habe ich | 272 |
| 43 | in der Welt | 270 |
| 44 | und vor allem | 268 |
| 45 | auch z. B. | 267 |
| 46 | nicht in der | 267 |
| 47 | Wenn man sich | 267 |
| 48 | so etwas wie | 266 |
| 49 | nichts zu tun | 261 |
| 50 | Die Frage ist | 259 |
| 51 | zu tun hat | 256 |
| 52 | gar nicht so | 252 |
| 53 | gibt es auch | 250 |
| 54 | Und in der | 250 |
| 55 | dass es sich | 249 |
| 56 | aber es ist | 242 |
| 57 | in Bezug auf | 241 |
| 58 | Ich weiß nicht | 240 |
| 59 | Ihnen alles Gute | 239 |
| 60 | noch nicht einmal | 236 |
| 61 | so ist es | 236 |
| 62 | aber auch nicht | 235 |
| 63 | Ist es nicht | 234 |
| 64 | im Gegensatz zu | 232 |
| 65 | kann ich nicht | 232 |
| 66 | geht es um | 229 |
| 67 | Dank für Ihre | 228 |
| 68 | nicht nur die | 227 |
| 69 | die Frage nach | 225 |
| 70 | Ich finde es | 225 |
| 71 | man in der | 224 |
| 72 | sich in der | 224 |
| 73 | Dann ist das | 221 |
| 74 | die von Ihnen | 221 |
| 75 | in diesem Fall | 221 |
| 76 | Das kann man | 219 |
| 77 | das mit der | 219 |
| 78 | dass sich die | 218 |
| 79 | das ist doch | 217 |
| 80 | auch für die | 216 |
| 81 | z. B. der | 216 |
| 82 | handelt es sich | 215 |
| 83 | in der Natur | 215 |
| 84 | im Sinne von | 212 |
| 85 | ja auch nicht | 212 |
| 86 | Dank für Ihr | 211 |
| 87 | Das mit dem | 209 |
| 88 | ist m. E. | 208 |
| 89 | Und nicht nur | 207 |
| 90 | auf dem Blog | 206 |
| 91 | Und es ist | 206 |
| 92 | es ist ja | 204 |
| 93 | gar nicht mehr | 202 |
| 94 | Es ist nicht | 201 |
| 95 | in der Praxis | 201 |
| 96 | wenn man das | 199 |
| 97 | Da gibt es | 198 |
| 98 | DAS ist die | 198 |
| 99 | in der Diskussion | 196 |
| 100 | in diesem Zusammenhang | 196 |

**Kommentare des Klima-Subkorpus (37.083)**

| Rang | Trigramm | Frequenz |
| --- | --- | --- |
| 1 | in den letzten | 728 |
| 2 | Sehr geehrter Herr | 706 |
| 3 | in der Tat | 607 |
| 4 | Vielen Dank für | 586 |
| 5 | Mit freundlichen Grüßen | 577 |
| 6 | in der Atmosphäre | 518 |
| 7 | In den USA | 513 |
| 8 | in der Lage | 512 |
| 9 | auf der Erde | 474 |
| 10 | auch in der | 452 |
| 11 | Aus meiner Sicht | 429 |
| 12 | Und das ist | 424 |
| 13 | wenn man die | 423 |
| 14 | z. B. die | 396 |
| 15 | in den nächsten | 379 |
| 16 | in Bezug auf | 378 |
| 17 | wie z. B. | 374 |
| 18 | es in der | 369 |
| 22 | meiner Meinung nach | 357 |
| 23 | In der Wissenschaft | 347 |
| 24 | dass sich die | 345 |
| 25 | Das ist ein | 339 |
| 26 | nicht in der | 331 |
| 27 | Das ist eine | 328 |
| 28 | mehr oder weniger | 327 |
| 29 | nicht nur die | 326 |
| 30 | Wenn man sich | 326 |
| 31 | in der Regel | 324 |
| 32 | an dieser Stelle | 302 |
| 33 | und vor allem | 301 |
| 34 | nach wie vor | 300 |
| 35 | Im Gegensatz zu | 298 |
| 36 | Und in der | 285 |
| 37 | Danke für die | 284 |
| 38 | gibt es auch | 277 |
| 39 | in der Physik | 275 |
| 40 | ist in der | 275 |
| 41 | Die von Ihnen | 274 |
| 42 | ist es nicht | 270 |
| 43 | auch für die | 265 |
| 44 | wenn Sie sich | 261 |
| 45 | in der Natur | 259 |
| 46 | aber das ist | 254 |
| 47 | auf jeden Fall | 254 |
| 48 | Danke für den | 248 |
| 49 | nichts zu tun | 248 |
| 50 | dass sie sich | 244 |
| 55 | Die Frage ist | 243 |
| 56 | Es geht um | 243 |
| 57 | z. B. in | 243 |
| 58 | so etwas wie | 242 |
| 59 | Da gibt es | 241 |
| 60 | die globale Erwärmung | 241 |
| 61 | im Vergleich zu | 241 |
| 62 | sich in der | 240 |
| 63 | es sich um | 236 |
| 64 | A und B | 235 |
| 65 | Das ist nicht | 235 |
| 66 | in der Arktis | 235 |
| 67 | es ist nicht | 234 |
| 68 | Und es ist | 233 |
| 69 | dass es sich | 232 |
| 70 | Das Problem ist | 231 |
| 71 | die in der | 227 |
| 72 | Es gibt keine | 227 |
| 73 | im Zusammenhang mit | 227 |
| 74 | Halte ich für | 224 |
| 75 | in diesem Fall | 224 |
| 76 | Das ist die | 220 |
| 77 | Das ist ja | 219 |
| 78 | die CO2 -Emissionen | 219 |
| 79 | im Rahmen der | 219 |
| 80 | zu tun hat | 219 |
| 81 | Ich finde es | 215 |
| 82 | gar nicht so | 214 |
| 83 | in diesem Zusammenhang | 214 |
| 84 | dann ist das | 209 |
| 85 | zu tun haben | 207 |
| 86 | Das ist der | 205 |
| 87 | in diesem Sinne | 205 |
| 88 | geht es um | 201 |
| 89 | handelt es sich | 201 |
| 90 | Das ist aber | 200 |
| 91 | das kann man | 200 |
| 92 | so gut wie | 197 |
| 93 | Es handelt sich | 196 |
| 94 | wenn man das | 196 |
| 95 | im Sinne von | 195 |
| 96 | in der Welt | 193 |
| 97 | wenn es um | 193 |
| 98 | Das ist doch | 192 |
| 99 | der globalen Erwärmung | 191 |
| 100 | ist für mich | 190 |

**Kommentare des Klima-Subkorpus, die nicht vom jeweiligen Post-Autor stammen (31.760)**

| 1 | Sehr geehrter Herr | 689 |
| --- | --- | --- |
| 2 | in den letzten | 662 |
| 3 | Mit freundlichen Grüßen | 556 |
| 4 | in der Lage | 472 |
| 5 | in der Atmosphäre | 465 |
| 6 | In den USA | 462 |
| 7 | auf der Erde | 450 |
| 8 | in der Tat | 440 |
| 9 | vielen Dank für | 405 |
| 10 | auch in der | 392 |
| 11 | wenn man die | 388 |
| 12 | Und das ist | 371 |
| 13 | in Bezug auf | 358 |
| 14 | in den nächsten | 355 |
| 15 | wie z. B. | 339 |
| 16 | Aus meiner Sicht | 335 |
| 17 | es in der | 329 |
| 18 | z. B. die | 329 |
| 19 | dass sich die | 321 |
| 20 | meiner Meinung nach | 319 |
| 21 | In der Wissenschaft | 299 |
| 22 | nicht nur die | 296 |
| 23 | nicht in der | 291 |
| 24 | in der Regel | 290 |
| 25 | wenn man sich | 286 |
| 26 | Das ist ein | 281 |
| 27 | mehr oder weniger | 278 |
| 28 | und vor allem | 273 |
| 29 | Im Gegensatz zu | 266 |
| 30 | Das ist eine | 263 |
| 31 | an dieser Stelle | 261 |
| 32 | Und in der | 258 |
| 33 | in der Physik | 257 |
| 34 | ist es nicht | 245 |
| 35 | gibt es auch | 241 |
| 36 | nach wie vor | 240 |
| 37 | in der Natur | 233 |
| 38 | ist in der | 231 |
| 39 | A und B | 230 |
| 40 | auch für die | 230 |
| 41 | Die von Ihnen | 229 |
| 42 | in der Arktis | 227 |
| 43 | danke für die | 222 |
| 44 | nichts zu tun | 222 |
| 45 | Es geht um | 218 |
| 46 | im Vergleich zu | 218 |
| 47 | Da gibt es | 217 |
| 48 | Die Frage ist | 217 |
| 49 | Es gibt keine | 213 |
| 50 | es ist nicht | 212 |
| 51 | im Zusammenhang mit | 211 |
| 52 | die CO2 -Emissionen | 209 |
| 53 | wenn sie sich | 209 |
| 54 | auf jeden Fall | 206 |
| 55 | Das Problem ist | 206 |
| 56 | sich in der | 206 |
| 57 | dass sie sich | 205 |
| 58 | so etwas wie | 205 |
| 59 | und es ist | 205 |
| 60 | es sich um | 204 |
| 61 | Das ist nicht | 203 |
| 62 | die in der | 203 |
| 63 | in diesem Fall | 202 |
| 64 | aber das ist | 200 |
| 65 | in diesem Zusammenhang | 200 |
| 66 | Ich finde es | 199 |
| 67 | dass es sich | 197 |
| 68 | im Rahmen der | 197 |
| 69 | zu tun hat | 197 |
| 70 | Das ist die | 196 |
| 71 | die globale Erwärmung | 194 |
| 72 | z. B. in | 188 |
| 73 | Danke für den | 186 |
| 74 | zu tun haben | 186 |
| 75 | Halte ich für | 182 |
| 76 | dann ist das | 180 |
| 77 | Das ist ja | 178 |
| 78 | gar nicht so | 178 |
| 79 | das kann man | 177 |
| 80 | handelt es sich | 175 |
| 81 | geht es um | 174 |
| 82 | in der Welt | 173 |
| 83 | Das ist der | 172 |
| 84 | die Frage nach | 172 |
| 85 | In meinen Augen | 171 |
| 86 | im Sinne von | 170 |
| 87 | ist für mich | 170 |
| 88 | wenn es um | 170 |
| 89 | Es handelt sich | 167 |
| 90 | im Sinne der | 167 |
| 91 | Und es gibt | 167 |
| 92 | wenn man das | 167 |
| 93 | in diesem Sinne | 166 |
| 94 | nicht der Fall | 164 |
| 95 | Das ist doch | 163 |
| 96 | Das ist aber | 162 |
| 97 | der globalen Erwärmung | 162 |
| 98 | kann man sich | 162 |
| 99 | in erster Linie | 161 |
| 100 | Dass es in | 158 |

**Kommentare des Klima-Subkorpus, die vom jeweiligen Post-Autor stammen (5.323)**

| 1 | Vielen Dank für | 181 |
| --- | --- | --- |
| 2 | in der Tat | 167 |
| 3 | aus meiner Sicht | 94 |
| 4 | Ihnen alles Gute | 70 |
| 5 | z. B. die | 67 |
| 6 | in den letzten | 66 |
| 7 | Das ist eine | 65 |
| 8 | Danke für den | 62 |
| 9 | Danke für die | 62 |
| 10 | auch in der | 60 |
| 11 | nach wie vor | 60 |
| 12 | Das ist ein | 58 |
| 13 | Dank für die | 56 |
| 14 | Dank für Ihr | 55 |
| 15 | z. B. in | 55 |
| 16 | Aber das ist | 54 |
| 17 | in der Atmosphäre | 53 |
| 18 | Und das ist | 53 |
| 19 | im Hinblick auf | 52 |
| 20 | wenn Sie sich | 52 |
| 21 | in den USA | 51 |
| 22 | für Ihr Interesse | 50 |
| 23 | mehr oder weniger | 49 |
| 24 | auf jeden Fall | 48 |
| 25 | in der Wissenschaft | 48 |
| 26 | die globale Erwärmung | 47 |
| 27 | künstliche neuronale Netze | 47 |
| 28 | so gut wie | 46 |
| 29 | Dank für Ihre | 45 |
| 30 | die von Ihnen | 45 |
| 31 | ist in der | 44 |
| 32 | halte ich für | 42 |
| 33 | an dieser Stelle | 41 |
| 34 | Das ist ja | 41 |
| 35 | in der Fachliteratur | 41 |
| 36 | es in der | 40 |
| 37 | in der Lage | 40 |
| 38 | nicht in der | 40 |
| 39 | Wenn man sich | 40 |
| 40 | Dank für den | 39 |
| 41 | dass Sie sich | 39 |
| 42 | In diesem Sinne | 39 |
| 43 | das ist aber | 38 |
| 44 | in diesem Blog | 38 |
| 45 | Jüdinnen und Juden | 38 |
| 46 | Meiner Meinung nach | 38 |
| 47 | so etwas wie | 37 |
| 48 | Und ich habe | 37 |
| 49 | das habe ich | 36 |
| 50 | gar nicht so | 36 |
| 51 | gibt es auch | 36 |
| 52 | auch für die | 35 |
| 53 | dass es sich | 35 |
| 54 | für den Hinweis | 35 |
| 55 | ich habe das | 35 |
| 56 | Wenn man die | 35 |
| 57 | wie z. B. | 35 |
| 58 | z. B. auch | 35 |
| 59 | in der Regel | 34 |
| 60 | ist das nicht | 34 |
| 61 | sich in der | 34 |
| 62 | so ist es | 34 |
| 63 | aber es ist | 33 |
| 64 | Das ist der | 33 |
| 65 | Das sehe ich | 33 |
| 66 | der von Ihnen | 33 |
| 67 | auch wenn Sie | 32 |
| 68 | Das ist nicht | 32 |
| 69 | es sich um | 32 |
| 70 | im Gegensatz zu | 32 |
| 71 | bleiben Sie gesund | 31 |
| 72 | kann ich nicht | 31 |
| 73 | noch nicht einmal | 31 |
| 74 | bitte bleiben Sie | 30 |
| 75 | dass Sie die | 30 |
| 76 | Es ist eine | 30 |
| 77 | künstlichen neuronalen Netzen | 30 |
| 78 | nicht nur die | 30 |
| 79 | Wenn Sie das | 30 |
| 80 | dann ist das | 29 |
| 81 | das ist doch | 29 |
| 82 | der globalen Erwärmung | 29 |
| 83 | Es geht nicht | 29 |
| 84 | Es handelt sich | 29 |
| 85 | Ich weiß nicht | 29 |
| 86 | wenn man das | 29 |
| 87 | wenn Sie die | 29 |
| 88 | aber auch nicht | 28 |
| 89 | auch in den | 28 |
| 90 | auch z. B. | 28 |
| 91 | Dank für Ihren | 28 |
| 92 | es ist ja | 28 |
| 93 | habe ich auch | 28 |
| 94 | hier im Blog | 28 |
| 95 | nicht um die | 28 |
| 96 | Und es ist | 28 |
| 97 | und vor allem | 28 |
| 98 | auf dem Blog | 27 |
| 99 | Das ist auch | 27 |
| 100 | es z. B. | 27 |

**Blogposts des gesamten SciLogs-Korpus (13.779)**

| 1 | in den letzten | 1388 |
| --- | --- | --- |
| 2 | in den USA | 1056 |
| 3 | auch in der | 941 |
| 4 | es sich um | 853 |
| 5 | in der Regel | 846 |
| 6 | auf der Erde | 844 |
| 7 | in der Tat | 788 |
| 8 | handelt es sich | 767 |
| 9 | nicht nur die | 746 |
| 10 | an dieser Stelle | 745 |
| 11 | in der Wissenschaft | 745 |
| 12 | nach wie vor | 735 |
| 13 | und vor allem | 735 |
| 14 | dass es sich | 643 |
| 15 | dass sich die | 637 |
| 16 | in der Lage | 631 |
| 17 | mehr oder weniger | 619 |
| 18 | es in der | 610 |
| 19 | sich in der | 610 |
| 20 | und in der | 608 |
| 21 | die in der | 599 |
| 22 | vor allem die | 585 |
| 23 | in diesem Fall | 569 |
| 24 | Es handelt sich | 547 |
| 25 | den letzten Jahren | 546 |
| 26 | Und das ist | 543 |
| 27 | auf jeden Fall | 531 |
| 28 | wie z. B. | 514 |
| 29 | wenn man sich | 508 |
| 30 | geht es um | 507 |
| 31 | im Laufe der | 504 |
| 32 | auch für die | 500 |
| 33 | in den nächsten | 497 |
| 34 | im Gegensatz zu | 489 |
| 35 | Auf diese Weise | 487 |
| 36 | an der Universität | 473 |
| 37 | in diesem Jahr | 471 |
| 38 | Auch in den | 469 |
| 39 | so etwas wie | 465 |
| 40 | auf dem Weg | 454 |
| 41 | zum ersten Mal | 453 |
| 42 | Das ist ein | 452 |
| 43 | gar nicht so | 450 |
| 44 | die Anzahl der | 442 |
| 45 | es um die | 437 |
| 46 | gibt es auch | 437 |
| 47 | im Vergleich zu | 436 |
| 48 | wenn man die | 429 |
| 49 | sich in den | 428 |
| 50 | z. B. die | 428 |
| 51 | kann man sich | 425 |
| 52 | die Zahl der | 422 |
| 53 | in der Nähe | 421 |
| 54 | bis hin zu | 420 |
| 55 | ist in der | 417 |
| 56 | Das ist eine | 409 |
| 57 | so gut wie | 408 |
| 58 | im Rahmen der | 405 |
| 59 | in der Natur | 401 |
| 60 | auf der anderen | 400 |
| 61 | der anderen Seite | 398 |
| 62 | des 20. Jahrhunderts | 394 |
| 63 | in Form von | 387 |
| 64 | auf den ersten | 383 |
| 65 | in der Welt | 381 |
| 66 | nicht nur in | 379 |
| 67 | die Frage nach | 377 |
| 68 | und auch die | 377 |
| 69 | der Suche nach | 375 |
| 70 | aber auch die | 370 |
| 71 | gibt es eine | 368 |
| 72 | zu tun hat | 365 |
| 73 | in der Praxis | 364 |
| 74 | mit der Zeit | 363 |
| 75 | eine Reihe von | 362 |
| 76 | von der Erde | 362 |
| 77 | im Hinblick auf | 360 |
| 78 | und damit auch | 360 |
| 79 | Blick auf die | 358 |
| 80 | es sich bei | 356 |
| 81 | auch heute noch | 353 |
| 82 | die in den | 349 |
| 83 | Nicht in der | 347 |
| 84 | in diesem Sinne | 346 |
| 85 | und so weiter | 344 |
| 86 | den ersten Blick | 343 |
| 87 | zu tun haben | 343 |
| 88 | es ist ein | 341 |
| 89 | im Bereich der | 341 |
| 90 | Aber nicht nur | 340 |
| 91 | ist es nicht | 340 |
| 92 | die Suche nach | 336 |
| 93 | in der Schule | 335 |
| 94 | Vor allem in | 335 |
| 95 | in Bezug auf | 334 |
| 96 | Es ist nicht | 333 |
| 97 | ist nicht nur | 333 |
| 98 | man in der | 333 |
| 99 | Wenn es um | 330 |
| 100 | im Zusammenhang mit | 329 |

**Blogposts des Klima-Subcorpus (1.291)**

| 1 | in den letzten | 407 |
| --- | --- | --- |
| 2 | in den USA | 220 |
| 3 | die globale Erwärmung | 199 |
| 4 | in der Wissenschaft | 152 |
| 5 | in der Atmosphäre | 148 |
| 6 | auch in der | 146 |
| 7 | der globalen Erwärmung | 144 |
| 8 | den letzten Jahren | 138 |
| 9 | auf der Erde | 133 |
| 10 | dass sich die | 123 |
| 11 | und vor allem | 123 |
| 12 | nicht nur die | 120 |
| 13 | in der Regel | 117 |
| 14 | in den nächsten | 115 |
| 15 | in der Arktis | 108 |
| 16 | nach wie vor | 107 |
| 17 | seit Beginn der | 107 |
| 18 | 2 ° C | 101 |
| 19 | und in der | 98 |
| 20 | in der Tat | 97 |
| 21 | in den Medien | 92 |
| 22 | des 20. Jahrhunderts | 91 |
| 23 | mehr oder weniger | 88 |
| 24 | Auch in den | 87 |
| 25 | die in der | 86 |
| 26 | vor allem die | 86 |
| 27 | auch für die | 84 |
| 28 | im Vergleich zu | 84 |
| 29 | auf dem Weg | 83 |
| 30 | in der Lage | 79 |
| 31 | es sich um | 78 |
| 32 | Blick auf die | 77 |
| 33 | es in der | 77 |
| 34 | sich in den | 77 |
| 35 | an dieser Stelle | 76 |
| 36 | sich in der | 76 |
| 37 | die globale Temperatur | 75 |
| 38 | Die Zahl der | 75 |
| 39 | an der Universität | 74 |
| 40 | es um die | 74 |
| 41 | auf diese Weise | 73 |
| 42 | handelt es sich | 73 |
| 43 | für die Zukunft | 72 |
| 44 | z. B. die | 71 |
| 45 | geht es um | 69 |
| 46 | in der Natur | 69 |
| 47 | nicht nur in | 69 |
| 48 | wie z. B. | 69 |
| 49 | In diesem Jahr | 68 |
| 50 | eine Reihe von | 67 |
| 51 | Vor allem in | 67 |
| 52 | in der Vergangenheit | 65 |
| 53 | Beginn der Aufzeichnungen | 64 |
| 54 | gibt es auch | 64 |
| 55 | z. B. in | 64 |
| 56 | in der Nähe | 63 |
| 57 | dass es sich | 62 |
| 58 | in die Atmosphäre | 62 |
| 59 | Wenn es um | 62 |
| 60 | aber auch die | 61 |
| 61 | im Laufe der | 60 |
| 62 | in Form von | 60 |
| 63 | Und das ist | 60 |
| 64 | 1,5 ° C | 59 |
| 65 | auch wenn die | 59 |
| 66 | Aus meiner Sicht | 59 |
| 67 | die in den | 58 |
| 68 | es geht um | 58 |
| 69 | So gut wie | 58 |
| 70 | wenn man die | 58 |
| 71 | an der Oberfläche | 57 |
| 72 | auf jeden Fall | 57 |
| 73 | in diesem Fall | 57 |
| 74 | nicht in der | 57 |
| 75 | aus dem Jahr | 56 |
| 76 | Es handelt sich | 56 |
| 77 | in der Welt | 56 |
| 78 | auch heute noch | 55 |
| 79 | bis hin zu | 55 |
| 80 | Im Gegensatz zu | 55 |
| 81 | bis zum Jahr | 54 |
| 82 | Das ist ein | 54 |
| 83 | über die letzten | 54 |
| 84 | im 20. Jahrhundert | 53 |
| 85 | Jüdinnen und Juden | 53 |
| 86 | Aber nicht nur | 52 |
| 87 | gar nicht so | 52 |
| 88 | im Bereich der | 52 |
| 89 | in den vergangenen | 52 |
| 90 | ist in der | 52 |
| 91 | und damit auch | 52 |
| 92 | und in den | 52 |
| 93 | bis in die | 51 |
| 94 | Durch den Klimawandel | 51 |
| 95 | und auch die | 51 |
| 96 | und so weiter | 51 |
| 97 | im Hinblick auf | 50 |
| 98 | und damit die | 50 |
| 99 | wie in der | 50 |
| 100 | zum ersten Mal | 50 |
